# Supplementary material for: Single cell expression and chromatin accessibility of the Toxoplasma gondii lytic cycle identifies AP2XII-8 as an essential ribosome regulon driver
Source: PubMed Central journal article supplement — Nat Commun. 2024 Aug 28;15:7419. doi: 10.1038/s41467-024-51011-7 (PMC11358496; doi:10.1038/s41467-024-51011-7), 2024-08-28

## Reporting Summary

Nature Portfolio wishes to improve the reproducibility of the work that we publish. This form provides structure for consistency and transparency in reporting. For further information on Nature Portfolio policies, see our [Editorial Policies](#) and the [Editorial Policy Checklist](#).

Please do not complete any field with "not applicable" or n/a. Refer to the help text for what text to use if an item is not relevant to your study. For final submission: please carefully check your responses for accuracy; you will not be able to make changes later.

### Statistics

For all statistical analyses, confirm that the following items are present in the figure legend, table legend, main text, or Methods section.

n/a Confirmed

- The exact sample size ( $n$ ) for each experimental group/condition, given as a discrete number and unit of measurement
- A statement on whether measurements were taken from distinct samples or whether the same sample was measured repeatedly
- The statistical test(s) used AND whether they are one- or two-sided  
*Only common tests should be described solely by name; describe more complex techniques in the Methods section.*
- A description of all covariates tested
- A description of any assumptions or corrections, such as tests of normality and adjustment for multiple comparisons
- A full description of the statistical parameters including central tendency (e.g. means) or other basic estimates (e.g. regression coefficient) AND variation (e.g. standard deviation) or associated estimates of uncertainty (e.g. confidence intervals)
- For null hypothesis testing, the test statistic (e.g.  $F$ ,  $t$ ,  $r$ ) with confidence intervals, effect sizes, degrees of freedom and  $P$  value noted  
*Give  $P$  values as exact values whenever suitable.*
- For Bayesian analysis, information on the choice of priors and Markov chain Monte Carlo settings
- For hierarchical and complex designs, identification of the appropriate level for tests and full reporting of outcomes
- Estimates of effect sizes (e.g. Cohen's  $d$ , Pearson's  $r$ ), indicating how they were calculated

*Our web collection on [statistics for biologists](#) contains articles on many of the points above.*

### Software and code

Policy information about [availability of computer code](#)

Data collection

Next-Generation Sequencing: NextSeq 550 (Illumina); NovaSeq 6000 (Illumina); MiSeq (Illumina)  
Widefield Microscope: DeltaVision Ultra (GE HealthCare)  
Multimodal Imager: Odyssey M (LI-COR)

Data analysis

Data were analyzed using  
1) cellranger-7.0.1 and cellranger-atac-2.1.0; 2) R (version 4.2.2) with Seurat R (version 4.3.0), MyElipsefit R, and dtwclust R packages;  
3) bedtools, BWA-mem (version 0.7.17), and samtools (version 1.4.1); 4) Python with scvelo package; 5) ToxoDB.org (version 64); 6) BAMM motif; 7) MEME-Suite package; 8) ImageJ Fiji (version 1.53f)

For manuscripts utilizing custom algorithms or software that are central to the research but not yet described in published literature, software must be made available to editors and reviewers. We strongly encourage code deposition in a community repository (e.g. GitHub). See the Nature Portfolio [guidelines for submitting code & software](#) for further information.

### Data

Policy information about [availability of data](#)

All manuscripts must include a [data availability statement](#). This statement should provide the following information, where applicable:

- Accession codes, unique identifiers, or web links for publicly available datasets
- A description of any restrictions on data availability
- For clinical datasets or third party data, please ensure that the statement adheres to our [policy](#)

Code Availability:

The analysis R code is available on GitHub: <https://github.com/umbibio/scToxoplasmaCDC> (DOI: 10.5281/zenodo.8219739).

Data Availability:

An interactive web-application for visualization and exploration of our data set can be found here: <https://umbibio.math.umb.edu/toxosc/>. scRNA-seq, scATAC-seq and CUT&RUN data (fastq) have been deposited to the Sequence Read Archive (SRA) under the accession number PRJNA1002574.

## Research involving human participants, their data, or biological material

Policy information about studies with [human participants or human data](#). See also policy information about [sex, gender \(identity/presentation\), and sexual orientation](#) and [race, ethnicity and racism](#).

Reporting on sex and gender

Reporting on race, ethnicity, or other socially relevant groupings

Population characteristics

Recruitment

Ethics oversight

Note that full information on the approval of the study protocol must also be provided in the manuscript.

## Field-specific reporting

Please select the one below that is the best fit for your research. If you are not sure, read the appropriate sections before making your selection.

Life sciences  Behavioural & social sciences  Ecological, evolutionary & environmental sciences

For a reference copy of the document with all sections, see [nature.com/documents/nr-reporting-summary-flat.pdf](https://www.nature.com/documents/nr-reporting-summary-flat.pdf)

## Life sciences study design

All studies must disclose on these points even when the disclosure is negative.

Sample size

1. All imaging and microscopy experiments were only performed once. The number of cells was detected by 10x Genomics Cell Ranger pipeline. The cell number was pre-determined before experiments according to the optimal cell recovery yield listed in the 10x Genomics protocol. Here we the number of cells collected for each run:  
 a) All imaging cells: 122,726 cells  
 b) All microscopy cells: 1,646 cells  
 2. The number of cells collected for each experiment was included. All the CUT&RUNs that were used for the final analysis except 810 cells and 1034 cells used 200 million intracellular parasites. The 810 cells and 1034 cells used 500 million intracellular parasites. The number of parasites was optimized to be 200 million for CUT&RUN. For detailed rationale, please refer to the main text.  
 3. For the microscopy-based assays, three biological replicates were performed for each experiment, and for each case, a minimum of 100 replicates were considered. 100 replicates are the standard choice in transcriptome single-cell analysis like these.

Data exclusions

**No data were excluded.**

Replication

**Two or three biological replicates were performed for each indicated experiments. All attempts at replicatoin were successful.**

Randomization

In our study, randomization was not employed because the experimental design and the nature of the experiments did not necessitate it. Randomization is typically crucial clinical studies or experiments involving multiple treatment groups to eliminate bias. However, our study's focus and methodology did not involve conditions where randomization would impact the results or conclusions.

Blinding

**We did not perform any blinding techniques as the quantitative analysis of the microscopy-based assays should not be affected by personal perception.**

## Behavioural & social sciences study design

All studies must disclose on these points even when the disclosure is negative.

Study description

Research sample

Sampling strategy

Data collection

Timing

Data exclusions

Non-participation

Randomization

# Ecological, evolutionary & environmental sciences study design

All studies must disclose on these points even when the disclosure is negative.

|                          |                      |
|--------------------------|----------------------|
| Study description        | <input type="text"/> |
| Research sample          | <input type="text"/> |
| Sampling strategy        | <input type="text"/> |
| Data collection          | <input type="text"/> |
| Timing and spatial scale | <input type="text"/> |
| Data exclusions          | <input type="text"/> |
| Reproducibility          | <input type="text"/> |
| Randomization            | <input type="text"/> |
| Blinding                 | <input type="text"/> |

Did the study involve field work?  Yes  No

## Field work, collection and transport

|                        |                      |
|------------------------|----------------------|
| Field conditions       | <input type="text"/> |
| Location               | <input type="text"/> |
| Access & import/export | <input type="text"/> |
| Disturbance            | <input type="text"/> |

## Reporting for specific materials, systems and methods

We require information from authors about some types of materials, experimental systems and methods used in many studies. Here, indicate whether each material, system or method listed is relevant to your study. If you are not sure if a list item applies to your research, read the appropriate section before selecting a response.

### Materials & experimental systems

| n/a                                 | Involved in the study                                     |
|-------------------------------------|-----------------------------------------------------------|
| <input type="checkbox"/>            | <input checked="" type="checkbox"/> Antibodies            |
| <input type="checkbox"/>            | <input checked="" type="checkbox"/> Eukaryotic cell lines |
| <input checked="" type="checkbox"/> | <input type="checkbox"/> Palaeontology and archaeology    |
| <input checked="" type="checkbox"/> | <input type="checkbox"/> Animals and other organisms      |
| <input checked="" type="checkbox"/> | <input type="checkbox"/> Clinical data                    |
| <input checked="" type="checkbox"/> | <input type="checkbox"/> Dual use research of concern     |
| <input checked="" type="checkbox"/> | <input type="checkbox"/> Plants                           |

### Methods

| n/a                                 | Involved in the study                           |
|-------------------------------------|-------------------------------------------------|
| <input checked="" type="checkbox"/> | <input type="checkbox"/> ChIP-seq               |
| <input checked="" type="checkbox"/> | <input type="checkbox"/> Flow cytometry         |
| <input checked="" type="checkbox"/> | <input type="checkbox"/> MRI-based neuroimaging |

## Antibodies

|                 |                      |
|-----------------|----------------------|
| Antibodies used | <input type="text"/> |
| Validation      | <input type="text"/> |

1. anti-IMC3 (N: 1-120 aa), rabbit [Anderson-White, B. R. et al. A family of intermediate filament-like proteins is sequentially assembled into the cytoskeleton of Toxoplasma gondii. Cell Microbiol 13, 18-31 (2011).]  
 2. anti-Centrin (clone 20H5), mouse [Millipore, Cat# 04-1624; RRID: AB\_10563501]  
 3. anti-Ty1 Tag Monoclonal Antibody (BB2), mouse [Thermo Fisher Scientific, Cat# MA5-23513; RRID: AB\_2610644]  
 4. anti-Ty1 Antibody (monoclonal), mouse [Diagenode, Cat# C1520054-10; https://www.diagenode.com/en/ty1-mono-clonal-antibody-classic-10-ug]  
 5. anti-IgG1 Isotype Control, mouse [Invitrogen, Cat# 02-6100; https://www.thermofisher.com/antibody/product/Mouse-IgG1-Monoclonal/02-6100]  
 6. anti-Tubulin (12G10), mouse [DSHB, Cat# 12G10 anti-alpha-tubulin; RRID: AB\_1157911]  
 7. anti-Mouse IgG (H+L) Highly Cross-Adsorbed Secondary Antibody, Alexa Fluor 594, goat [Thermo Fisher Scientific, Cat# A-11032; https://www.thermofisher.com/antibody/product/Goat-anti-Mouse-IgG-H-L-Highly-Cross-Adsorbed-Secondary-Antibody-Polyclonal/A-11032]  
 8. anti-Rabbit IgG (H+L) Secondary Antibody, Alexa Fluor 488-5 nm colloidal gold, goat [Thermo Fisher Scientific, Cat# A-31565; RRID: AB\_253617]  
 9. anti-Mouse Immunoglobulins/HRP, goat [Agilent, Cat# P0447; RRID: AB\_2617137]  
 10. anti-H3K4me3, rabbit [EpiCypher, Cat# 13-0041k; https://www.epicypher.com/products/antibodies/snap-chip-certified-antibodies/histone-h3k4me3-antibody-snap-chip-certified-cutana-cut-run-compatible]

## Eukaryotic cell lines

Policy information about [cell lines](#) Before experiments except the immunofluorescence assays (IFAs) [ATCC, Cat# CRL-4001; sex of this cell line is male]

Cell line source(s) 1. BJ-1 human telomerase reverse transcriptase (hTERT)-immortalized human foreskin fibroblasts (HFFs) were used for parasite maintenance and all the other experiments except the immunofluorescence assays (IFAs) [ATCC, Cat# CRL-4001; sex of this cell line is male]  
2. HFFs were only used for the IFAs [ATCC, Cat# SCRC-1041; sex of this cell line is male]  
3. T. gondii RH was obtained from published work [PMID: 19218426]  
4. All the other T. gondii lines were created in this study

Authentication The hTERT-immortalized HFFs, HFFs, and T. gondii RH were authenticated by the providers and had published records. All the T. gondii mutants created in this study were validated through PCR assays with specific primers.

Mycoplasma contamination No mycoplasma contamination was observed in any cell lines used for experiments at any time.

Commonly misidentified lines (See [ICLAC](#) register) We did not use any commonly misidentified lines in this study.

## Palaeontology and Archaeology

Specimen provenance

Specimen deposition

Dating methods

Tick this box to confirm that the raw and calibrated dates are available in the paper or in Supplementary Information.

Ethics oversight

Note that full information on the approval of the study protocol must also be provided in the manuscript.

## Animals and other research organisms

Policy information about [studies involving animals](#); [ARRIVE guidelines](#) recommended for reporting animal research, and [Sex and Gender in Research](#)

Laboratory animals

Wild animals

Reporting on sex

Field-collected samples

Ethics oversight

Note that full information on the approval of the study protocol must also be provided in the manuscript.

## Clinical data

Policy information about [clinical studies](#)

All manuscripts should comply with the ICMJE [guidelines for publication of clinical research](#) and a completed [CONSORT checklist](#) must be included with all submissions.

Clinical trial registration

Study protocol

Data collection

Outcomes

## Dual use research of concern

Policy information about [dual use research of concern](#)

### Hazards

Could the accidental, deliberate or reckless misuse of agents or technologies generated in the work, or the application of information presented in the manuscript, pose a threat to:

- | No                       | Yes                                                 |
|--------------------------|-----------------------------------------------------|
| <input type="checkbox"/> | <input type="checkbox"/> Public health              |
| <input type="checkbox"/> | <input type="checkbox"/> National security          |
| <input type="checkbox"/> | <input type="checkbox"/> Crops and/or livestock     |
| <input type="checkbox"/> | <input type="checkbox"/> Ecosystems                 |
| <input type="checkbox"/> | <input type="checkbox"/> Any other significant area |

## Experiments of concern

Does the work involve any of these experiments of concern:

- | No                       | Yes                                                                                                  |
|--------------------------|------------------------------------------------------------------------------------------------------|
| <input type="checkbox"/> | <input type="checkbox"/> Demonstrate how to render a vaccine ineffective                             |
| <input type="checkbox"/> | <input type="checkbox"/> Confer resistance to therapeutically useful antibiotics or antiviral agents |
| <input type="checkbox"/> | <input type="checkbox"/> Enhance the virulence of a pathogen or render a nonpathogen virulent        |
| <input type="checkbox"/> | <input type="checkbox"/> Increase transmissibility of a pathogen                                     |
| <input type="checkbox"/> | <input type="checkbox"/> Alter the host range of a pathogen                                          |
| <input type="checkbox"/> | <input type="checkbox"/> Enable evasion of diagnostic/detection modalities                           |
| <input type="checkbox"/> | <input type="checkbox"/> Enable the weaponization of a biological agent or toxin                     |
| <input type="checkbox"/> | <input type="checkbox"/> Any other potentially harmful combination of experiments and agents         |

## Plants

|                       |                      |
|-----------------------|----------------------|
| Seed stocks           | <input type="text"/> |
| Novel plant genotypes | <input type="text"/> |
| Authentication        | <input type="text"/> |

## ChIP-seq

### Data deposition

- Confirm that both raw and final processed data have been deposited in a public database such as [GEO](#).
- Confirm that you have deposited or provided access to graph files (e.g. BED files) for the called peaks.

|                                                                    |                      |
|--------------------------------------------------------------------|----------------------|
| Data access links<br><i>May remain private before publication.</i> | <input type="text"/> |
| Files in database submission                                       | <input type="text"/> |
| Genome browser session<br>(e.g. <a href="#">UCSC</a> )             | <input type="text"/> |

### Methodology

|                         |                      |
|-------------------------|----------------------|
| Replicates              | <input type="text"/> |
| Sequencing depth        | <input type="text"/> |
| Antibodies              | <input type="text"/> |
| Peak calling parameters | <input type="text"/> |
| Data quality            | <input type="text"/> |
| Software                | <input type="text"/> |

## Flow Cytometry

### Plots

Confirm that:

- The axis labels state the marker and fluorochrome used (e.g. CD4-FITC).
- The axis scales are clearly visible. Include numbers along axes only for bottom left plot of group (a 'group' is an analysis of identical markers).
- All plots are contour plots with outliers or pseudocolor plots.
- A numerical value for number of cells or percentage (with statistics) is provided.

### Methodology

Sample preparation

Instrument

Software

Cell population abundance

Gating strategy

- Tick this box to confirm that a figure exemplifying the gating strategy is provided in the Supplementary Information.

## Magnetic resonance imaging

### Experimental design

Design type

Design specifications

Behavioral performance measures

Imaging type(s)

Field strength

Sequence & imaging parameters

Area of acquisition

Diffusion MRI  Used  Not used

### Preprocessing

Preprocessing software

Normalization

Normalization template

Noise and artifact removal

Volume censoring

### Statistical modeling & inference

Model type and settings

Effect(s) tested

Specify type of analysis:  Whole brain  ROI-based  Both

Statistic type for inference

(See [Eklund et al. 2016](#))

Correction

## Models & analysis

n/a | Involved in the study

- Functional and/or effective connectivity
- Graph analysis
- Multivariate modeling or predictive analysis

Functional and/or effective connectivity

Graph analysis

Multivariate modeling and predictive analysis

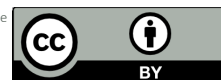

Supplement: 41467_2024_51011_MOESM15_ESM.pdf [file 41467_2024_51011_MOESM15_ESM.pdf]
